# Supplementary material for: A Genome-Wide Association Study Identifies New Loci Involved in Wound-Induced Lateral Root Formation in Arabidopsis thaliana
Source: Front Plant Sci. 2019 Mar 15;10:311. doi: 10.3389/fpls.2019.00311 (PMC6428781; doi:10.3389/fpls.2019.00311)
Supplement: Supplementary file 2 [file Table_2.XLSX]

## Sheet: Hoja1
Gene	NASC ID	T-DNA stock / Primer	Oligonucleotide sequences (5' → 3')
At4g01090	N586312	Salk_086312	GCTTATCAAGATCCTTATG	TTATGTAACCTTTCCTGAG
At4g33530	N572850	Salk_072850	TGACCCTTATCATGCTTC	TTATTACCAGCTTCTTCAG
	N620707	Salk_120707	TAATCTTATCTTGATGAGTG	GAAGCTAGTGGATCTTAC
At5g19710	N616200	Salk_116200c	ACATATCAATCCGGTTGAT	TTGAAGAAGCTAGAATCAG
T-DNA		LBb1.3	ATTTTGCCGATTTCGGAAC
At4g26410		qPCR	GAGCTGAAGTGGCTTCCATGAC	GGTCCGACATACCCATGATCC
At5g19710		qPCR	GTGCTATCAAAGTTGTTAAG	TCTGTTGGACCAGCTTG
